1 **HETEROGENEITY VERSUS THE COVID-19 PANDEMIC**

2 Ramalingam Shanmugam<sup>1</sup>, Gerald Ledlow<sup>2</sup> and Karan P. Singh<sup>3</sup>

3  
4 <sup>1</sup>Professor of Statistics and Honorary Professor of International Studies

5 School of Health Administration, Texas State University

6 San Marcos, TX 78666, USA

7 Email: [rs25@txstate.edu](mailto:rs25@txstate.edu)

8 [ORCID number 0000-0002-3388-1014](#)

9 <sup>2</sup>Professor and Dean, Department of Healthcare Policy, Economics and Management

10 School of Community and Rural Health

11 The University of Texas Health Sciences Center at Tyler

12 Tyler, TX 11937, USA

13 Email: [gerald.ledlow@uthct.edu](mailto:gerald.ledlow@uthct.edu)

14 <sup>3</sup>Professor and Chair, Department of Epidemiology and Biostatistics

15 The University of Texas Health Sciences Center at Tyler

16 Tyler, TX 11937, USA

17 Email: [karan.singh@uthct.edu](mailto:karan.singh@uthct.edu)

18 [ORCID number 0000-0002-1841-846X](#)

19

## 20 **Abstract**

21 In this paper, heterogeneity is formally defined, and its properties are explored. We define and  
22 distinguish observable versus non-observable heterogeneity. It is proposed that *heterogeneity* among the  
23 vulnerable is a significant factor in the contagion impact of COVID-19, as demonstrated with incidence  
24 rates on a Diamond Princess Cruise ship in February 2020. Given the nature of the disease, its  
25 heterogeneity and human social norms, pre-voyage and post-voyage quick testing procedures may  
26 become the new standard for cruise ship passengers and crew. The technological advances in testing  
27 available today would facilitate more humanistic treatment as compared to more archaic quarantine and  
28 isolation practices for all onboard ship. With quick testing, identification of those infected and thus not  
29 allowed to embark on a cruise or quarantining those disembarking and other mitigation strategies, the  
30 popular cruise adventure could be available safely again. Whatever the procedures implemented, the  
31 methodological purpose of this study should add valuable insight in the modeling of disease and  
32 specifically, the COVID-19 virus.

33

34 **Key Words:** Observed homogeneity; non-observed homogeneity; over dispersion; under dispersion;  
35 Poisson distribution; binomial distribution; Tango's test statistic.

36

## 37 **1. INTRODUCTION**

38 In the literature, the term *heterogeneity* echoes differently in various contexts. What is heterogeneity  
39 or its antonym, homogeneity? Its root word lies in Greek "*heterogenes*" meaning different. In  
40 epidemiology or statistics disciplines, the word heterogeneity is popularly commented to exist when the  
41 variance is large. In insurance applications, for an example, the premium is assessed more if the insurer  
42 is in a heterogeneous group with high hazard proneness (Spreeuw, 1999). Should a large (small)

43 variance be indicative of heterogeneity (homogeneity)? Interesting discussions are given for  
44 heterogeneity in Ecochard (2006); in healthcare disciplines, heterogeneity is referred to as different  
45 outcomes among patients. Should the heterogeneity be connected to only a non-observable hidden trait  
46 as done in genetics? Does heterogeneity refer dissimilar attributes across the subgroups of the population  
47 itself even before sampling? Is heterogeneity really pointing to the non-identical nature in a random  
48 sample or population? Should heterogeneity imply a shifting entity? In genetic studies, several authors  
49 refer to genetic heterogeneity as rather too difficult to ascertain. What do they really mean? If alleles in  
50 more than one locus exhibit susceptibility to a disease, there is a need to track the loci to infer their  
51 heterogeneity. So, in a sense, the application of heterogeneity is really a discussion of an opposite of  
52 similarity across loci. The reader is referred to Elston et al. (2003, pages 3404-344) for details. Hope and  
53 Norris (2013) attempted to determine how heterogeneity played a role in judgements in the context of  
54 crime victimization. Hence, what really is heterogeneity? A formal definition of heterogeneity is  
55 constructed later in the article, then, its properties are explored and itemized.

56       However, in the epidemiology literature, using a random sample  $y_1, y_2, \dots, y_n$  from a population  
57 whose main parameter is  $\theta$ , when the null hypothesis  $H_o : \theta_1 = \theta_2 = \dots = \theta_n$  is tested, it is named the  
58 *homogeneity test*. This suggests that heterogeneity is really all about a shifting population. This creates  
59 more confusion. Is the source of such confusion with respect to heterogeneity its ill communication? It is  
60 evident that there is a lack of a clear definition of heterogeneity given by Hunink et al. (2018, Chapter  
61 12) for details. Neither the *Encyclopedia of Statistical Sciences* nor the *Encyclopedia of Biostatistics* has  
62 even an entry, as if it is not pertinent in statistical disciplines.

63       One comes across different types of data in epidemiologic studies. Drawing data from a binomial  
64 population is one of them, and the data should possess an under dispersion (i.e., variance of the binomial  
65 distribution is smaller than its mean). From a Poisson population, the drawn random sample ought to

66 reflect equality between the mean and variance. When the main (incidence rate) parameter of a Poisson  
67 chance mechanism is stochastically transient, the unconditional observation of the random variable  
68 convolutes to an inverse binomial model (Ross, 2002). The inverse binomial distribution is known to  
69 attest that the variance is larger than its mean (Stuart and Ord, 2015, for details). Consequently, a  
70 comparison between the mean and variance characterizes only which type binomial, Poisson, or inverse  
71 binomial possesses the underlying chance mechanism we are sampling from but does not inform  
72 anything about heterogeneity.

73 With details about the probabilistic patterns among coronavirus confirmed, recovered, or cured  
74 individuals and those that succumb as fatalities/deaths in the thirty-two states/territories of India are  
75 given by Shanmugam (2020). To track the confusion with respect to heterogeneity, let us consider the  
76 data given in Table 1 (Mizumoto and Chowell, 2020), describing the spread of COVID-19 among the  
77 voyagers in a Diamond Princess Cruise ship, during the month of February 2020. The random variables  
78  $Y_1$ ,  $Y_2$ , and  $Y_3$  denote, respectively, the number of COVID-19 cases, the number of asymptomatic cases  
79 and the number of symptomatic cases among them in time (date). Under a given COVID-19's  
80 prevalence rate,  $\lambda > 0$ , the number  $Y_1$  perhaps follows a Poisson probability pattern. For a given number  
81 of COVID-19 cases in a date, the number  $Y_2$  perhaps follows a binomial probability pattern with  
82 parameters  $(y_1, p)$ , where  $0 < p < 1$  denotes the chance for a COVID-19 case to exhibit no symptoms.  
83 Naturally, the number  $Y_3$  should follow a binomial probability pattern with parameters  $(y_1, 1 - p)$ . There is  
84 an implicitness between  $Y_2$  and  $Y_3$ , in the sense that  $Y_2 + Y_3 = Y_1$ . There are three-time oriented groups of  
85 COVID-19 incidences in Table 1. Is there an observable heterogeneity among the three groups? If so, is  
86 it due to a non-observable (parametric) heterogeneity? How do we define and distinguish observable  
87 versus non-observable heterogeneity? A literature search in epidemiology and/or biostatistics does not  
88 provide an answer to this question.

89 It is evident that the average of COVID-19 cases is an estimate of COVID-19's prevalence rate (i.e.,  
90  $\hat{\lambda}$  in Table 1). Their estimates impress that the prevalence rate is transient, not constant across every pair  
91 of two-day duration dyads. The Poisson population from which the COVID-19 cases are drawn ought to  
92 have been dynamic, implying the existence of a Poisson heterogeneity. How do we define and/or capture  
93 the heterogeneity level? This is the theme and purpose in this research article.

94 Likewise, given that a fixed number,  $y_1$  of COVID-19 cases has occurred, a part of them might be  
95 asymptomatic cases,  $y_2$  and the remaining are symptomatic cases,  $y_3$ . That is,  $y_2$  and  $y_3$  are  
96 complementary but  $y_2 + y_3 = y_1$ . Is there heterogeneity in each of the two sub-binomial populations,  
97 whether there is a heterogeneity in  $y_1$ ? How should each *binomial heterogeneity* be defined and  
98 computed? In other words, is binomial heterogeneity different from that of Poisson heterogeneity? If so,  
99 what are the differences? A literature search in epidemiology and/or biostatistics offers no help to prove  
100 either the existence or absence of binomial heterogeneity in the data for  $y_2$  or  $y_3$  in Table 1. Hence, we  
101 continue probing matters with respect to heterogeneity.

102 The concept of heterogeneity seems to have escaped the researchers and epidemiologists' scrutiny  
103 for a long time. It is time well spent and worthwhile to revive an interest in the construct of  
104 heterogeneity, and that is exactly what this article is trying to accomplish. Hence, we first define and  
105 construct an approach for the idea of heterogeneity. To be specific, we first discuss Poisson  
106 heterogeneity and then take up binomial heterogeneity. Maybe our research direction about  
107 heterogeneity is, perhaps, pioneering. However, we believe that our approach is easily extendable for  
108 many other similar methodological setups. We illustrate our definition and all derived expressions for  
109 heterogeneity using COVID-19's data pertaining to the Diamond Princess Cruise ship, Yokohama, 2020  
110 as displayed in Table 1.

111

## 112 2. POISSON AND BINOMIAL HETEROGENEITIES

113 Applied epidemiologists emphasize that heterogeneity is of paramount importance in extracting and  
114 interpreting data evidence. Many data analysts are convinced that an unrecognized heterogeneity leads  
115 to a biased inference. To begin with, what is heterogeneity? It is a factor causing non-similarities. If so,  
116 how many sources are there? We contemplate that there are two sources for heterogeneity to exist. One  
117 source ought to be from the drawn random sample of observations:  $y_1, y_2, \dots, y_n$ , which we recognize as  
118 *observable heterogeneity*. Would the sampling variability,  $Var[f(y_1, y_2, \dots, y_n | \theta)]$  for a selected statistic  
119  $f(y_1, y_2, \dots, y_n | \theta)$  express the observable heterogeneity? Another source is manifested in non-  
120 observable parameter,  $\theta$  of the chance mechanism, which we recognize as *non-observable*  
121 *heterogeneity*. Would a non-uniform stochastic pattern of  $\theta$  be indicative of the non-observable  
122 homogeneity? If the chance mechanism perversely selects a probability density function (pdf) for  $\theta$ ,  
123 how would it manifest itself to portray the non-observable heterogeneity? Both observable and non-  
124 observable heterogeneity together ought to be involved to make any definition of heterogeneity  
125 complete. If so, how do we integrate them? Often, under/over-dispersion is confused with heterogeneity.  
126 It seems that the over/under dispersion is precipitated by heterogeneity but not the other way. It is not  
127 obvious or proven so far in the epidemiology literature on whether the converse is true. We focus only  
128 on Poisson and binomial populations to address heterogeneity, and these arguments can be repeated for  
129 other populations considering similar methods.

130

### 131 2.1. POISSON HETEROGENEITY

132 Recall that the random integer,  $Y_1$  denoting the number of COVID-19 cases in a place (like the  
133 Diamond Princess cruise ship) at a time (like February, 2020) is a Poisson random variable with a  
134 specified prevalence rate,  $\lambda > 0$ . That is, the conditional probability of observing  $y_1$  number of COVID-

135 19 cases under a prevalence rate  $\lambda > 0$  is  $\Pr[Y_1 = y_1 | \lambda] = e^{-\lambda} \lambda^{y_1} / y_1!$ ;  $y_1 = 0, 1, 2, \dots$ ;  $\lambda > 0$  with its  
136 expected number  $E[Y_1 | \lambda] = \lambda$  and variability  $Var[Y_1 | \lambda] = E[Y_1 | \lambda]$ . The reader is referred to Rajan and  
137 Shanmugam (2020) for detailed derivations of the Poisson mean and variance. The prevalence parameter  
138  $\lambda$  itself is crucial in our discussions. The Poisson variability cannot be heterogeneity, because the  
139 expected value also changes when the variability changes due to their inter-relatedness. Realize that no  
140 two individuals on the ship are assumed to have the same level of susceptibility to the COVID-19 virus.  
141 It is reasonable to imagine that the prevalence levels follow a conjugate, stochastic gamma distribution.  
142 The so-called conjugate prior knowledge in the Bayesian framework smooths the statistical analytic  
143 process. It is known that the conjugate prior for the Poisson distribution is gamma, whose pdf is

144

$$145 \quad c(\lambda | \alpha, \beta) d\lambda = e^{-(\alpha\lambda)} (\alpha\lambda)^{\beta-1} d(\alpha\lambda) / \Gamma(\beta); \alpha > 0; \beta > 0, \quad (1)$$

146

147 with an average.  $E(\lambda | \alpha, \beta) = \frac{\beta}{\alpha}$  and variability  $Var(\lambda | \alpha, \beta) = E(\lambda | \alpha, \beta) / \alpha$ , where the parameters  $\alpha$  and  
148  $\beta$  are recognized as *hyper-parameters* (Rajan and Shanmugam, 2020). Notice that the hyper parameter  
149  $\alpha > 0$  causes the variability in the COVID-19's prevalence rate to fluctuate up or down, and, hence, you  
150 would anticipate the heterogeneity to involve the hyperparameter  $\alpha$ . But the question is how?

151 We assume that the probability of observing a non-negative COVID-19 case,  $y_1$  is a Poisson under a  
152 stable sampling population  $\Pr(Y_1 | \lambda)$  with an expected number  $E(Y_1 | \lambda) = \lambda$  and a variability  
153  $Var(Y_1 | \lambda) = E(Y_1 | \lambda)$ . With replications, the observable heterogeneity should become estimable. That is  
154 to mention, the maximum likelihood estimate (MLE) of the COVID-19 prevalence rate is the average  
155 number,  $\bar{y}_1$ , of the observations. To discuss the non-observable heterogeneity, we need to integrate its

156 conjugate prior  $c(\lambda | \alpha, \beta)$  for the non-observable  $\lambda$  with the likelihood  $\Pr(Y_1 | \lambda)$  and it results in an update  
157 and it is called posterior pdf for  $\lambda$ . The expressions for non-observable heterogeneity, observable  
158 heterogeneity and other expressions are given in Appendix I.

## 159 2.2. BINOMIAL HETEROGENEITY

160 In this section, we explore heterogeneity for two sub-binomial processes emanating from a Poisson  
161 process. The asymptomatic number,  $Y_2$  and symptomatic number,  $Y_3$  of COVID-19 cases are two  
162 branching binomial random numbers out of the Poisson random number,  $Y_1 = 0, 1, 2, \dots$ ; of COVID-19  
163 cases. These two split random variables are complementary of each other in the sense that  $Y_2 + Y_3 = Y_1$ .  
164 Then, what are the underlying model for  $Y_2$  and for  $Y_3$ ? Are they correlated random variables? If so, what  
165 is their correlation? These are pursued in this section.

166 Let  $I$  be an indicator random variable defined as:  $I_i = 1$  for a COVID-19 case to be asymptomatic  
167 with a probability,  $0 < p < 1$  and  $I_i = 0$  for the case to be symptomatic with a probability,  $0 < 1 - p < 1$ .

168 Then, for a fixed  $y_1$ , the random variable,  $Y_2 = \sum_{i=1}^{Y_1} I_i$  follows a binomial probability distribution with  
169 parameters  $(y_1, p)$ . Likewise, for a fixed  $y_1$ , the random variable,  $Y_3 = y_1 - Y_2$  follows a complementary  
170 binomial distribution with parameters  $(y_1, 1 - p)$ . That is,

$$171 \Pr(Y_2 = y_2 | y_1, p) = \binom{y_1}{y_2} p^{y_2} (1 - p)^{y_1 - y_2}; y_2 = 0, 1, 2, \dots, y_1; 0 < p < 1 \quad (2)$$

172 and

$$173 \Pr(Y_3 = y_3 | y_1, p) = \binom{y_1}{y_3} (1 - p)^{y_3} p^{y_1 - y_3}; y_3 = 0, 1, 2, \dots, y_1; 0 < 1 - p < 1 \quad (3)$$

174 The expressions for non-observable heterogeneity, observable heterogeneity and other expressions  
175 are given in Appendix II.



176

### 177 3. TANGO INDEX

178 Lastly, we develop the *Tango index* and its significance level over the time period. Tango (1984)  
179 proposed an index to detect disease clusters in grouped data. This index received considerable attention  
180 in the literature. Following the line of thinking in Tango (1984), we could next assess the MLEs of  
181 several entities we estimated and displayed in Tables 1, 2, and 3. There are three groups of duration.  
182 Group 1 consists of the 15<sup>th</sup> and 16<sup>th</sup> of February 2020. Group 2 includes data for 17<sup>th</sup> and 18<sup>th</sup> of  
183 February 2020. Group 3 contains data of 19<sup>th</sup> and 20<sup>th</sup> of February 2020. Two independent contrasts  
184 among the three groups are feasible. In an arbitrary style, we select to compare Group 1 with Group 2  
185 and then Group 2 with Group 3. For this purpose, we formulate a contrast matrix

186

$$187 \quad A_{3 \times 3} = \begin{pmatrix} -1 & 0 & 1 \\ 1 & -1 & 0 \\ 0 & 1 & 0 \end{pmatrix}, \quad (4)$$

188

189 where the third column of the matrix needs no explanation. The Tango's statistic  $T = \underline{r}' A \underline{r}$  follows a chi-  
190 square distribution with  $\nu = 2$  degrees of freedom (df), where  $\underline{r}'_{3 \times 3}$  is a row vector of the MLE of a chosen  
191 entity in our analytic results in Table 1 or Table 2 or Table 3. For an example, let  $\underline{r}' = (68.5, 93.5, 46)$   
192 for the MLE of the COVID-19 prevalence rate,  $\lambda$  in the groups. Then, the Tango's test statistic is  
193  $T = 422.25$  with  $\nu = 2$  df and  $p\text{-value} = 2.03975E-92$ . Likewise, the Tango's test statistic value and  
194 its p-value are calculated and displayed in Table 4 for other entities.

195

### 196 4. ILLUSTRATING USING COVID-19 DATA OF THE DIAMOND PRINCESS CRUISE SHIP

197 In this section we illustrate all the concepts and expressions of Section 2. Let us consider the  
198 COVID-19 data in Table 1 for the Diamond Princess Cruise Ship, 2020. The Diamond Princess is  
199 a cruise ship registered in Britain and operated across the globe. During a cruise that began on 20  
200 January 2020, positive cases of COVID-19 linked to the pandemic were confirmed on the ship in  
201 February 2020. Over 700 people out of 3,711 became infected (567 out of 2,666 passengers and 145 out  
202 of 1,045 crew), and 14 passengers died. To be specific, on the 15<sup>th</sup> of February 2020, 67 people were  
203 infected, on the 16<sup>th</sup> of February 2020, 70 people were infected, on the 17<sup>th</sup> of February 2020, there were  
204 99 COVID-19 cases, on the 18<sup>th</sup> of February, another 88 cases were confirmed. The U.S. government  
205 initially asked Japan to keep the passengers and crew members on board the ship for 14 days. The U.S.  
206 government, however, later decided to bring them to an Air Force base in California and a base in San  
207 Antonio, Texas.

208 For each specified day in the first column in Table 1, the estimate of COVID-19's prevalence rate  
209 and its variance are calculated using expressions  $\hat{\lambda} = \bar{y}_1$  and  $V\hat{a}r(Y_1|\lambda) = s_{y_1}^2$ . Both the prevalence and its  
210 variability increased and then decreased over the days. However, their correlation,  $\hat{\rho}_{y_2, y_3}$  is calculated  
211 using the observed numbers on  $y_2$  and  $y_3$  for each day (see in Table 2) and the estimated correlations had  
212 been stable over the days. Substituting  $\hat{\lambda} = \bar{y}_1$  and  $V\hat{a}r(Y_1|\lambda) = s_{y_1}^2$  in the expression

$$213 \quad \hat{H}_\lambda = \frac{\hat{\lambda}}{\hat{\lambda} + V\hat{a}r(Y_1|\lambda)}, \quad (5)$$

214 we obtained the non-observable heterogeneity and displayed in Table 2. The non-observable Poisson  
215 heterogeneity for  $y_1$  was high on the beginning day, came down later, and then increased. Using  $\hat{\lambda} = \bar{y}_1$  and  
216  $V\hat{a}r(Y_1|\lambda) = s_{y_1}^2$  in the expression

$$217 \quad \hat{H}_{\bar{y}_1} = \left[1 + \frac{(1 + \frac{\bar{\lambda}}{s_\lambda^2})}{6}\right]^{-1}, \quad (6)$$

218 we obtained the observable heterogeneity and displayed in Table 2. The observable Poisson  
 219 heterogeneity was low on the first day, increased and then decreased. Note in Table 2 that the observable  
 220 and non-observable Poisson heterogeneities are inversely proportional. In other words, the estimate of  
 221 the shape and scale parameter in the Bayesian approach are respectively  $\hat{\alpha} = \frac{\bar{\lambda}^2}{s_\lambda^2}$  and  $\hat{\beta} = \frac{\bar{\lambda}}{s_\lambda^2}$  (see their  
 222 values in Table 2). The shape parameter value decreased consistently over the days. The scale parameter  
 223 was high to begin with, then increased later. The distance,  $d(y_1, \lambda)$  between the observable and non-  
 224 observable Poisson mechanism for  $y_1$  is calculated using the expression

$$225 \quad d(y_1, \lambda) = \{\beta(1 - \beta) \pm 1\} \left(\frac{\alpha}{\{1 + \beta\}^2}\right) \quad (7)$$

226 and displayed in Table 2. Notice that the distance was large to begin with, then decreased but increased  
 227 later over the days.

228 Note that we compute  $\hat{p}_i = \frac{y_2}{y_1}$  for the  $i^{\text{th}}$  day. Then, we calculate the

$$229 \quad \text{average: } \bar{p} = \sum_{i=1}^2 p_i / 2 \quad \text{and the variance: } s_p^2 = \frac{(p_1 - p_2)^2}{4} \quad (\hat{p} \text{ in Table 1),}$$

230 and it had been steadily increasing over the days since 15<sup>th</sup> February 2020. This is something valuable for  
 231 medical professionals learning the clinical nature of COVID-19. Using the expression,

$$232 \quad \text{odds}_{y_2} \approx e^{-p\lambda} \{1 + e^{-p(1-p)\lambda}\} \quad (8)$$

233 in Section 2.2, we calculated the odds for a COVID-19 case to become an asymptomatic type and  
 234 displayed in Table 2.

235

236 Likewise, using the expression

$$237 \quad odds_{y_3} \approx e^{-(1-p)\lambda} \{1 + e^{-p(1-p)\lambda}\}, \quad (9),$$

238 we estimated the odds for a COVID-19 case to become a symptomatic case as shown in Table 2. Notice  
239 that both odds ( $Odds_{y_2}$  and  $Odds_{y_3}$ ) are low but their odds ratio,

$$240 \quad OR_{\frac{y_3}{y_2}} = e^{-(1-2p)\lambda} \quad (10)$$

241 is not negligible but reveals that the situation is favorable to symptomatic rather than asymptomatic.

242 This discovery is feasible because of the approach, and it is an eye-opening reality for the medical

243 professionals in their desire to control the spread of the COVID-19 virus. Both the observable,  $\hat{H}_{y_2|y_1}$  and

244 non-observable,  $\hat{H}_{y_1,\gamma,\delta}$  binomial heterogeneity (see their values in Table 3) were decreasing for the

245 number,  $y_2$  of asymptomatic COVID-19 cases. The distance,  $d(y_2, p)$  between the observable and non-

246 observable for asymptomatic cases was moderate in the beginning, then increased, and then decreased

247 over the next days (see their values in Table 3). However, the distance,  $d(Y_2, Y_3)$  between the observable,

248  $y_2$  of the asymptomatic cases and the observable,  $y_3$  of the symptomatic cases was narrow, then wider,

249 and then moderate over the days (their values in Table 3).

250 For a COVID-19 case to become a symptomatic type, the chance is moderate to less and then more

251 over the days ( $1-\bar{p}$  in Table 3). The estimate of the shape and scale parameter happened to be  $\hat{\gamma}$  and  $\hat{\delta}$

252 respectively (see their values in Table 3). Both the shape parameter and the scale parameter values

253 decreased drastically over the days. From the p-values in Table 4, we infer that the prevalence rate,  $\hat{\lambda}$ ,

254 the distances,  $d(y_1, \lambda)$ ,  $d(y_2, p)$  and  $d(Y_2, Y_3)$  do differ significantly over the three groups of dyad days.

255 The chance for COVID-19 to become an asymptomatic type does not differ significantly across the three

256 groups. On the contrary, the non-observable heterogeneities  $H_{\hat{\lambda}}$  of the Poisson random number,  $y_1$  and

257  $\hat{H}_{y_1, \gamma, \delta}$  of the binomial random number,  $y_2$  are not significant. Likewise, the observable heterogeneities  $\hat{H}_{y_1}$   
 258 of the Poisson random number,  $y_1$  and  $\hat{H}_{y_2|y_1}$  of the binomial random number,  $y_2$  for a given  $y_1$  are not  
 259 significant.

260

261 **Table 1. COVID-19 in Cruise Ship, 2020, Mizumoto et al. (2020)**

| Date            | $Y_3$  | $Y_2$  | $Y_1$  | $\bar{\lambda} = \bar{y}_1$ | $s_\lambda^2 = \text{Var}(Y_1)$ | $OR_{\frac{1 \rightarrow 2}{0 \rightarrow 1}}$ | $Odds_{y_1}$ |
|-----------------|--------|--------|--------|-----------------------------|---------------------------------|------------------------------------------------|--------------|
| Feb 15-16, 2020 | 29, 32 | 38, 38 | 67, 70 | 68.5                        | 4.5                             | 0.5001                                         | 1.7E-30      |
| Feb 17-18, 2020 | 29, 23 | 70, 65 | 99, 88 | 93.5                        | 60.5                            | 0.5000                                         | 2.4E-41      |
| Feb 19-20, 2020 | 11, 7  | 68, 6  | 79, 13 | 46                          | 21.78                           | 0.5002                                         | 1.0E-20      |

262

263 **Table 2. Results for Mizumoto et al.'s COVID-19 Data in Diamond Princess**

| Date            | $OR_{\frac{Y_3}{Y_2}}$ | $\hat{H}_{y_1}$ | $\hat{\beta}$ | $\hat{\alpha}$ | $d(y_1, \lambda)$ | $H_\lambda$ |
|-----------------|------------------------|-----------------|---------------|----------------|-------------------|-------------|
| 15, 16 Feb 2020 | 943.88                 | <b>0.27</b>     | 15.22         | 1042.72        | 857.81            | 0.93        |
| 17, 18 Feb 2020 | 7.36E+17               | <b>0.70</b>     | 1.54          | 144.50         | 18.79             | 0.61        |
| 19, 20 Feb 2020 | 9.69E+11               | <b>0.65</b>     | 2.11          | 97.15          | 23.56             | 0.67        |

264

265 **Table 3. Results for Asymptomatic COVID-19 Cases in Mizumoto et al. (2020)**

| Date            | $1 - \bar{p} =$<br>$1 - \text{Ave}\left(\frac{y_2}{y_1}\right)$ | $s_p^2$<br>$= \text{Var}\left(\frac{y_2}{y_1}\right)$ | $\hat{H}_{y_1, \gamma, \delta}$ | $\hat{H}_{y_2 y_1}$ | $d(y_2, p)$ | $d(Y_2, Y_3)$ |
|-----------------|-----------------------------------------------------------------|-------------------------------------------------------|---------------------------------|---------------------|-------------|---------------|
| 15, 16 Feb 2020 | 0.45                                                            | 0.0002                                                | <b>0.99</b>                     | <b>0.95</b>         | 37.125      | 6.85          |

|                 |      |        |             |             |      |       |
|-----------------|------|--------|-------------|-------------|------|-------|
| 17, 18 Feb 2020 | 0.28 | 0.0004 | <b>0.98</b> | <b>0.89</b> | 66.6 | 41.14 |
| 19, 20 Feb 2020 | 0.34 | 0.0796 | 0.10        | <b>0.74</b> | 29.7 | 14.72 |

266 **Table 4. Tango's Test Statistic and Its P-Value for Several Entities**

| Tango statistic | $\hat{H}_{y_1}$ | $H_{\hat{\lambda}}$ | $\bar{p}$ | $\hat{H}_{y_1, \gamma, \delta}$ | $\hat{H}_{y_2 y_1}$ | $d(y_1, \lambda)$ | $d(y_2, p)$ | $d(Y_2, Y_3)$ |
|-----------------|-----------------|---------------------|-----------|---------------------------------|---------------------|-------------------|-------------|---------------|
| T with 2 df     | 0.25            | 0.36                | 0.41      | <b>0.77</b>                     | <b>0.51</b>         | 699420            | 260.66      | 751.20        |
| p-value         | 0.87            | 0.83                | 0.81      | <b>0.67</b>                     | <b>0.77</b>         | 0.0E100           | 2.4E-57     | 7.5E-164      |

267

## 268 5. DISCUSSION AND CONCLUSION

269 The risk of contracting the COVID-19 virus during a cruise is more than in a community setting, as  
 270 confined spaces discourage non-pharmaceutical mitigation strategies such as social distancing to be  
 271 weakly implemented and breathing air is tightly internalized. More nations are afraid to let the voyagers  
 272 come ashore at the seaports. Ships are not even permitted to dock at the port, as to not complicate virus  
 273 mitigation efforts by the local surrounding communities. The scenario seems to be anti-humanistic. The  
 274 medical doctors and/or pharmaceutical service were strained due to the infected and COVID-19-free  
 275 voyagers. Lack of clear symptoms among those that were infected added to difficulties in managing the  
 276 COVID-19 crisis onboard the ship, and for any ship for that matter. Most importantly, how do we  
 277 dispose of the COVID-19 fatalities (bodies), in a safe manner?

278 In the midst of uncertainties about the root cause and/or the appearance of any symptoms, the best  
 279 modelers can do (as it is done in this article) is to devise a methodology to address the observable as  
 280 well as non-observable heterogeneity, estimate the proportion of COVID-19 cases to be asymptomatic,  
 281 estimate the odds of becoming symptomatic, and also the odds ratio for asymptomatic in comparison to  
 282 those symptomatic among COVID-19 cases. Some of these are non-trivial to the professional experts

283 dealing with the intention of reducing the spread of COVID-19 if not its total control. Still much of  
284 COVID-19 is a mysterious pandemic. It is clear that non-pharmaceutical mitigation strategies such as  
285 social distancing, utilization of face coverings, frequent hand sanitization, infected people quarantining  
286 on board, and severely controlled ship cleanliness and sanitation standards are required; this may only be  
287 successful with limited numbers of passenger and crew members. Given the nature of the disease, its  
288 heterogeneity and human social norms, pre-voyage and post-voyage quick testing procedures may  
289 become the new standard for cruise ship passengers and crew. The technological advances in testing  
290 provided today would facilitate more humanistic treatment as compared to more archaic quarantine and  
291 isolation practices for all onboard ship. With quick testing, identification of those infected and thus not  
292 allowed to embark on a cruise or quarantine those disembarking, and other mitigation strategies, the  
293 popular cruise adventure could be available safely again. Whatever the procedures implemented, the  
294 methodological purpose of this study should add valuable insight in the modeling of disease and  
295 specifically, the COVID-19 virus.

296

297 **Funding** None.

298 **Conflict of interest** The authors have no conflict of interest.

299 **Availability of data and materials** There is no other data or materials other than what are in the  
300 manuscript itself.

301 **Code availability** None.

302 **Authors' contribution** The authors contributed everything in the manuscript.

303 **Acknowledgements** The authors thanks Texas State University and The University of  
304 Texas Health Science Center at Tyler for the support to write this  
305 article.

306 **6. REFERENCES**

- 307 1. Blumenfeld D. *Operations Research Calculations Handbook*, CRC Press, Boca Raton, Florida,  
308 2020.
- 309 2. Ecochard J. Heterogeneity in fecundability studies: issues and modeling, *Statistical Methods in*  
310 *Medical Research*; 2006, 15: 141-160.
- 311 3. Elston R, Olson J, Palmer L. *Biostatistical Genetics and Genetic Epidemiology*, Wiley Press,  
312 Baffins Lane, Chichester, West Sussex, UK, 2002.
- 313 4. Hope T, Norris P. Heterogeneity in the frequency distribution of crime victimization, *Journal of*  
314 *Quantitative Criminology*; 2013, 29 (4): 543-576.
- 315 5. Hunink MG, Weinstein MC, Wittenberg E, Drummond MF, Pliskin JS, Wong JB, Glasziou PF.  
316 *Decision making in health and medicine: Integrating evidence and values*, Cambridge University  
317 Press, Cambridge, UK, 2018.
- 318 6. Khokhlov V. Conditional value-at-risk for elliptical distributions, *Evropský časopis Ekonomiky a*  
319 *Management*; 2016, 2 (6): 70–79.
- 320 7. Mizumoto K, Chowell G. Transmission potential of the novel coronavirus (COVID-19) onboard  
321 the Diamond Princess Cruises Ship, 2020, *Infectious Disease Modelling*; 2020, 5: 264-270.
- 322 8. Mizumoto K, Kagaya K, Zarebski A, Chowell G. Estimating the asymptomatic proportion of  
323 coronavirus disease 2019 (COVID-19), cases on board the Diamond Princess cruise ship,  
324 Yokohama, 2020. *Euro Surveill*; 2020, 25(10): 1560-7917.
- 325 9. Rajan C, Shanmugam R. *Discrete Distributions in Engineering and the Applied Sciences*,  
326 *Synthesis Lectures on Mathematics and Statistics, Vol. 12, Pages 1-227*, Morgan & Claypool  
327 Press, 82 Winter Sport Ln, Williston, VT 05495, USA, 2020.



- 328 10. Ross S. (2002) *A First Course in Probability*, sixth edition, Prentice Hall, Upper Saddle River,  
329 New Jersey 07458, 2002.
- 330 11. Shanmugam R. Probabilistic Patterns among Coronavirus Confirmed, Cured and Deaths in  
331 Thirty-two India's States/Territories, *International Journal of Ecological Economics and*  
332 *Statistics*, 41 (4), 45-56, 2020, in press.
- 333 12. Shanmugam R, Radhakrishnan R. Incidence jump rate reveals over/under dispersion in count  
334 data, *International Journal of Data Analysis, and Information Systems*, 3(1), 1-8, 2011.
- 335 13. Spreeuw J. Heterogeneity in hazard rates in insurance, Tinbergen Institute of Research Series,  
336 210, *Ph. D. thesis*, University of Amsterdam, Amsterdam, 1999.
- 337 14. Stuart A, Ord K. *Kendall's Advanced Theory of Statistics, Volume 1*. Oxford University Press,  
338 London, 2015.
- 339 15. Tango T. The detection of disease clustering in time, *Biometrics*; 1984, 40: 15-26.

340

341

342

343

344

345

346

347

348

349

350

351 **APPENDIX I**

352 **Poisson Heterogeneity: Derivations**

353 It is known that the conjugate prior for the Poisson distribution is gamma, whose pdf is

354

$$355 \quad c(\lambda|\alpha, \beta)d\lambda = e^{-(\alpha\lambda)}(\alpha\lambda)^{\beta-1}d(\alpha\lambda)/\Gamma(\beta); \alpha > 0; \beta > 0, \quad (1)$$

356

357 with an average.  $E(\lambda|\alpha, \beta) = \frac{\beta}{\alpha}$  and variability  $Var(\lambda|\alpha, \beta) = E(\lambda|\alpha, \beta) / \alpha$ , where the parameters  $\alpha$

358 and  $\beta$  are recognized as *hyper-parameters* (Rajan and Shanmugam, 2020). Notice that the hyper

359 parameter  $\alpha > 0$  causes the variability in the COVID-19's prevalence rate to fluctuate up or down and

360 hence, you would anticipate the heterogeneity to involve the hyperparameter  $\alpha$ .

$$361 \quad c(\lambda|y_1, \alpha, \beta) = \Pr(y_1|\lambda)c(\lambda|\alpha, \beta) / \int_{-\infty}^{\infty} \Pr(y_1|\lambda)c(\lambda|\alpha, \beta)d\lambda \quad (2)$$

362 is the posterior pdf of the non-observable  $\lambda$ . Also, the denominator

$$363 \quad \int_0^{\infty} \Pr(y_1|\lambda)c(\lambda|\alpha, \beta)d\lambda = \Gamma(\alpha + y_1) / (1 + \beta)^{\alpha+y_1},$$

364 in a Bayesian framework, is called the *marginal distribution*. With  $\Delta_\lambda = \lambda - E(\lambda)$ , it is clear that

$$365 \quad \int_{-\infty}^{\infty} \Delta_\lambda c(\lambda|\alpha, \beta)d\lambda = 0, \text{ note that the prior variance is}$$

$$366 \quad Var(\lambda|\alpha, \beta) = \int_{-\infty}^{\infty} \Delta_\lambda^2 c(\lambda|\alpha, \beta)d\lambda.$$

367 Because the prior is conjugate, its counterpart's variability

$$368 \quad Var(\lambda|y_1, \alpha, \beta) = \int_{-\infty}^{\infty} (\lambda - E[\lambda|y_1, \alpha, \beta])^2 c(\lambda|\alpha, \beta)d\lambda$$

369 is minimal when the Bayes estimate of the non-observable is the posterior mean,  $\lambda_{Bayes} = E[\lambda | y_1, \alpha, \beta]$ ,

370 where

$$371 \quad E[\lambda | y_1, \alpha, \beta] = \frac{(\alpha + \bar{y}_1)}{\beta}.$$

372 Differentiating the log-likelihood function

$$373 \quad \ln L(n\bar{y}_1, \lambda) = n\bar{y}_1 \ln \lambda - n\lambda + \sum_{i=1}^n \ln(y_i!)$$

374 with respect to the non-observable parameter,  $\lambda$ , setting it equal to zero and solving it, we obtain the

375 MLE and it is  $\hat{\lambda}_{mle} = \bar{y}_1$ . Because of the invariance property of the MLE, it is involved. The invariance

376 property refers to that the MLE of a function of the parameter is the function of the MLE of the

377 parameter. Also, it is known (Blumenfeld, 2010) that

378

$$379 \quad E_{prior} E_{likelihood}(\bar{y}_1 | \lambda) = E(\bar{y}_1) \quad \text{and}$$

$$380 \quad Var(\bar{y}_1) = E_{prior} Var_{likelihood}(\bar{y}_1 | \lambda) + Var_{prior} E_{likelihood}(\bar{y}_1 | \lambda). \quad (3)$$

381

382 Hence, we are ready now to define the non-observable heterogeneity below in the Definition 1.

383

384 *Definition 1.* The non-observable heterogeneity of the Poisson parameter,  $\lambda$  is defined as

385

$$386 \quad H_\lambda = \left[ 1 + \frac{Var_{prior} E_{likelihood}(\bar{y}_1 | \lambda)}{E_{prior} Var_{likelihood}(\bar{y}_1 | \lambda)} \right]^{-1} \in [0, 1]. \quad (4)$$

387

388 Following the Definition 1, we obtain the *non-observable heterogeneity* of the COVID-19 cases is

389 
$$H_\lambda = [1 + \frac{1}{\beta}]^{-1} \in [0,1] \tag{5}$$

390 When the value of  $H_\lambda$  is closer to zero, the data are believed to have non-observable Poisson  
 391 homogeneity. Its MLE is

392 
$$\hat{H}_\lambda = [1 + \frac{1}{\hat{\beta}}]^{-1} = [1 + \frac{s_\lambda^2}{\bar{\lambda}}]^{-1} = \frac{\bar{\lambda}}{\bar{\lambda} + s_\lambda^2} . \tag{6}$$

393  
 394 The reader is referred to Figure 1 for the configuration of the non-observable Poisson heterogeneity in  
 395 general.

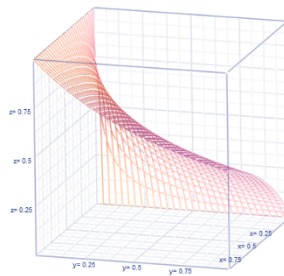

396  
 397 **Figure 1. Non-observable Heterogeneity**

398  
 399 Likewise, the *observable-heterogeneity* is defined below in Definition 2.

400  
 401 *Definition2.* The observable heterogeneity of the randomly sampled Poisson counts,  $y_1, y_2, \dots, y_n$  is  
 402 defined as

403 
$$H_{\bar{y}_1} = [1 + \frac{Var_{\text{marginal}} E_{\text{posterior}}(\lambda | \bar{y}_1)}{E_{\text{marginal}} Var_{\text{posterior}}(\lambda | \bar{y}_1)}]^{-1} \in [0,1] . \tag{7}$$

405 Before we apply the Definition 2, let us recollect that the marginal pdf of the complete sufficient  
 406 statistic,  $\bar{y}_1$  is uniform distribution and the posterior distribution is

$$407 \quad c(\lambda | \bar{y}_1, \alpha, \beta) = (1 + \beta)^{(\alpha + n\bar{y}_1)} [e^{-(1+\beta)\lambda}]^{(\alpha + n\bar{y}_1) - 1} / \Gamma(\alpha + n\bar{y}_1)$$

408 with

$$409 \quad E(\lambda | \bar{y}_1, \alpha, \beta) = \frac{(\alpha + n\bar{y}_1)}{(1 + \beta)} \quad (8)$$

410 and

$$411 \quad Var(\lambda | \bar{y}_1, \alpha, \beta) = \frac{E(\lambda | \bar{y}_1, \alpha, \beta)}{(1 + \beta)}. \quad (9)$$

412 Imposing the Definition 2 and simplifying, we obtain that  $H_{\bar{y}_1} = [1 + \frac{(1 + \beta)}{6}]^{-1}$  whose MLE is

$$413 \quad \hat{H}_{\bar{y}_1} = [1 + \frac{(1 + \hat{\beta})}{6}]^{-1} = [1 + \frac{(1 + \frac{\bar{\lambda}}{s_{\lambda}^2})}{6}]^{-1} \in [0, 1]. \quad (10)$$

414 The reader is referred to Figure 2 for the configuration of the observable Poisson heterogeneity,  $\hat{H}_{\bar{y}_1}$  in  
 415 general. When the value of  $\hat{H}_{\bar{y}_1}$  is closer to zero, the data are interpreted to have observable homogeneity.

416

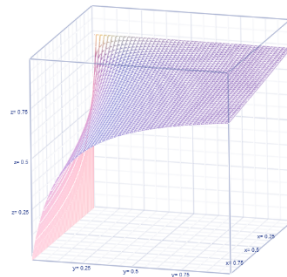

417

418

**Figure 2. Observable Heterogeneity**

419

420 Furthermore, the distance,  $d(y_1, \lambda)$  between the observable  $y_1$  of the number of COVID-19 cases and the  
 421 prevalence rate  $\lambda$  could be assessed using the formula

422

$$423 \quad d(y_1, \lambda) = E_{Y_1} E_{\lambda} |Y_1 - \lambda| = \sum_{y_1=0}^{\infty} \int_0^{\infty} |Y_1 - \lambda| \Pr(y_1 | \lambda) c(\lambda | \bar{y}_1, \alpha, \beta) d\lambda. \quad (11)$$

424 Realizing that their absolute difference is really  $|Y_1 - \lambda| = Y_1 + \lambda - 2 \min\{Y_1, \lambda\}$ , we obtain after  
 425 simplifications that

$$426 \quad d(y_1, \lambda) = \{\beta(1 - \beta) \pm 1\} \left( \frac{\alpha}{\{1 + \beta\}^2} \right). \quad (12)$$

427 The configuration of the distance,  $d(y_1, \lambda)$  between the observable and non-observable in Poisson  
 428 mechanism. We now turn to discuss stochastic properties of the Poisson distribution are given in Figure  
 429 3.

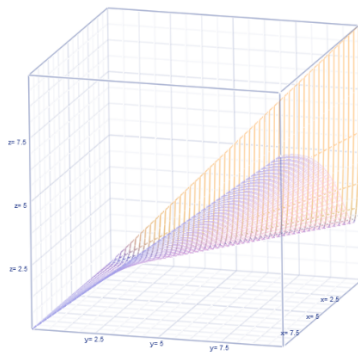

430

431 **Figure 3. Distance,  $d(y_1, \lambda)$  in Poisson.**

432

433 The survival function of the random number,  $Y_1$  of COVID-19 cases is

$$434 \quad S_{Y_1}(r | \lambda) = \Pr(Y_1 \geq r | \lambda) = \sum_{i=r}^{\infty} e^{-\lambda} \lambda^i / i! = P[\chi_{2(r+1)df}^2 < 2\lambda]; \lambda > 0. \quad (13)$$

435 The hazard rate is a force of mortality. The hazard rate,  $h(y_1)$  for the COVID-19 occurrence is

436

$$437 \quad h(y_1) = \frac{\Pr(y_1 | \lambda)}{S(y_1 + 1 | \lambda)} = \frac{e^{-\lambda} \lambda^{y_1}}{y_1! P[\chi_{2(y_1+2)df}^2 < 2\lambda]}; \lambda > 0. \quad (14)$$

438

439 Does the Poisson chance mechanism keep any a finite *memory*? For example, the geometric distribution

440 is known to have no memory. What is memory? The memory is really a conditional probability. That is,

441

$$442 \quad \text{memory} = \Pr(Y_1 \geq s | y_1 \geq r) = \frac{\Pr(Y_1 \geq r + s)}{\Pr(Y_1 \geq r)} = \frac{P[\chi_{2(r+s+1)df}^2 < 2\lambda]}{P[\chi_{2(r+1)df}^2 < 2\lambda]}; \lambda > 0, \quad (15)$$

443

444 confirming that there is a finite memory in the Poisson mechanism of COVID-19 incidences. To be

445 specific, with  $r = 0, s = 1$  in the above result, the memory between COVID-19 free situation and just one

446 COVID-19 occurrence is revealed in the chance-oriented Poisson mechanism. Such a memory is

$$447 \quad \text{memory}_{y_{0 \rightarrow 1}} = \frac{P[\chi_{4df}^2 < 2\lambda]}{P[\chi_{2df}^2 < 2\lambda]}; \lambda > 0. \quad (16)$$

448 Likewise, the memory between at least one COVID-19 case situation and at least two COVID-19 cases

449 situation is revealed with a substitution of  $r = 1, s = 1$  in the above result and it is

$$450 \quad \text{memory}_{y_{1 \rightarrow 2}} = \frac{P[\chi_{6df}^2 < 2\lambda]}{P[\chi_{4df}^2 < 2\lambda]}; \lambda > 0. \quad (17)$$

451 The odds ratio from the initial  $\text{memory}_{y_{0 \rightarrow 1}}$  to the next  $\text{memory}_{y_{1 \rightarrow 2}}$  is

452

$$453 \quad OR_{\frac{1 \rightarrow 2}{0 \rightarrow 1}} = \frac{P[\chi_{6df}^2 < 2\lambda] P[\chi_{2df}^2 < 2\lambda]}{\{P[\chi_{4df}^2 < 2\lambda]\}^2} \quad (18)$$

454

455 (their values in Table 1). However, the odds for COVID-19 free healthy situation to prevail is

456

457 
$$Odds_{Y_1} = \frac{\Pr(Y_1 = 0)}{\Pr(Y_1 \geq 1)} = (e^\lambda - 1)^{-1}; \lambda > 0 \quad (19)$$

458

459 (their values in Table 1). For details on how the chance for an incidence of a disease to occur from a

460 disease-free scenario changes, the reader is referred to Shanmugam and Radhakrishnan (2011).

461



462 **APPENDIX II**

463 **Binomial Heterogeneity: Derivations**

464 Let an indicator random variable,  $I_i = 1$  for a COVID-19 case to be asymptomatic with a probability,  
465  $0 < p < 1$  and  $I_i = 0$  for the case to be symptomatic with a probability,  $0 < 1 - p < 1$ . Then, for a fixed  $y_1$ ,

466 the random variable,  $Y_2 = \sum_{i=1}^{y_1} I_i$  follows a binomial probability distribution with parameters  $(y_1, p)$ .

467 Likewise, for a fixed  $y_1$ , the random variable,  $Y_3 = y_1 - Y_2$  follows a complementary binomial distribution  
468 with parameters  $(y_1, 1 - p)$ . That is,

469 
$$\Pr(Y_2 = y_2 | y_1, p) = \binom{y_1}{y_2} p^{y_2} (1 - p)^{y_1 - y_2}; y_2 = 0, 1, 2, \dots, y_1; 0 < p < 1 \quad (20)$$

470 and

471 
$$\Pr(Y_3 = y_3 | y_1, p) = \binom{y_1}{y_3} (1 - p)^{y_3} p^{y_1 - y_3}; y_3 = 0, 1, 2, \dots, y_1; 0 < 1 - p < 1 \quad (21)$$

472 with their conditional expected numbers

473 
$$E(Y_2 | y_1, p) = y_1 p \quad E(Y_3 | y_1, 1 - p) = y_1 (1 - p) = y_1 - E(Y_2 | y_1, p) \quad (22)$$

474 and the conditional variabilities

475 
$$\text{Var}(Y_2 | y_1, p) = (1 - p) E(Y_2 | y_1, p), \quad (23)$$

476 and

477 
$$\text{Var}(Y_3 | y_1, 1 - p) = p E(Y_3 | y_1, 1 - p). \quad (24)$$

478

479 The conditional variability of  $Y_2$  is a percent  $(1 - p)$  of its expected number  $E(Y_2 | y_1, p)$ , implying

480 that it exhibits under dispersion. Likewise, the conditional variability of  $Y_3$  is a percent  $(1 - p)$  of its

481 expected number  $E(Y_3 | y_1, p) = y_1(1 - p)$  implying that it also exhibits under dispersion. Together, the  
 482 above statements suggest a conditional balance

$$483 \quad \frac{E(Y_2 | y_1, p)}{E(Y_3 | y_1, 1 - p)} = \text{odds(asmptomatic)} = \frac{p}{(1 - p)} \quad (25)$$

484 (Stuart and Ord, 2015 for details of the odds concepts). Consequently, we note that

$$485 \quad p = \frac{E(Y_2 | y_1, p)}{E(Y_2 | y_1, p) + E(Y_3 | y_1, 1 - p)}. \quad (26)$$

486 Furthermore, we wonder whether the random variables  $Y_2$  and  $Y_3$  are correlated? The answer is  
 487 affirmative. To identify their correlation, notice that

$$488 \quad E(Y_2) = E_{Y_1} E(Y_2 | y_1) = E_{Y_1} (Y_1 p) = p\lambda,$$

$$489 \quad E(Y_3) = E_{Y_1} E(Y_3 | y_1) = E_{Y_1} (Y_1 \{1 - p\}) = (1 - p)\lambda$$

$$490 \quad \text{Var}(Y_2) = E_{Y_1} \text{Var}(Y_2 | y_1) + \text{Var}_{Y_1} E(Y_2 | y_1) = E_{Y_1} \{Y_1 p(1 - p)\} + \text{Var}_{Y_1} (Y_1 p) = p\lambda$$

$$491 \quad \text{Var}(Y_3) = E_{Y_1} \text{Var}(Y_3 | y_1) + \text{Var}_{Y_1} E(Y_3 | y_1) = E_{Y_1} \{Y_1 p(1 - p)\} + \text{Var}_{Y_1} (Y_1 \{1 - p\}) = (1 - p)\lambda$$

$$492 \quad \text{Cov}(Y_2, Y_3) = E_{Y_1} E(Y_2 Y_3 | y_1) - E_{Y_1} E(Y_2 | y_1) E_{Y_1} E(Y_3 | y_1)$$

493 where

$$494 \quad E_{Y_1} E(Y_2 | y_1) = p\lambda, E_{Y_1} E(Y_3 | y_1) = (1 - p)\lambda,$$

$$495 \quad E_{Y_1} E(Y_2 Y_3 | y_1) = E_{Y_1} E_{Y_2} E_{Y_3 | Y_2, Y_1} (Y_2 Y_3 | Y_1) = E_{Y_1} E_{Y_2 | Y_1} \{Y_2 Y_1 (1 - p)\} = E_{Y_1} \{p(1 - p) Y_1^2\} = p(1 - p)\lambda(1 + \lambda).$$

496

497 Hence, their correlation is

$$498 \quad \rho_{Y_2, Y_3} = \frac{\text{Cov}(Y_2, Y_3)}{\sqrt{\text{Var}(Y_2)\text{Var}(Y_3)}} = \sqrt{p(1 - p)}. \quad (27)$$

499 Their expected distance,  $d(Y_2, Y_3) = E_{Y_1} E(|Y_2 - Y_3| | Y_1)$  portrays the drift between the symptomatic  
 500 observable,  $Y_2$  and the asymptomatic observable,  $Y_3$  and it is simplified to this function

501  $d(Y_2, Y_3) = |2p - 1|\lambda$  (see Table 3 for their values), due to applying

$$502 \quad |Y_2 - Y_3| = Y_2 + Y_3 - 2 \min\{Y_2, Y_3\}.$$

503 Let us assume that every COVID-19 case has the same chance of being asymptomatic in a time  
 504 period. Then, the random number,  $y_2$  for a specified number,  $y_1$  of COVID-19 cases follows a binomial  
 505 distribution with parameters  $(y_1, p)$ . We select a conjugate beta prior distribution

$$506 \quad c(p|\gamma, \delta)dp = \Gamma(\gamma + \delta)p^{\gamma-1}(1-p)^{\delta-1} / \Gamma(\gamma)\Gamma(\delta); 0 < p < 1; \gamma, \delta > 0 \quad (28)$$

508  
 509 for our discussion for asymptomatic COVID-19 cases. The prior average is

$$510 \quad \mu_{prior} = E(p|\gamma, \delta) = \frac{\gamma}{(\gamma + \delta)}$$

511 and the prior variability is

$$512 \quad Var(p|\gamma, \delta) = \mu_{prior}(1 - \mu_{prior}) / (1 + \gamma + \delta),$$

513 where the parameters  $\gamma$  and  $\delta$  are hyper-parameters (Rajan and Shanmugam, 2020, for details). We  
 514 guess that the binomial heterogeneity would involve both hyper parameters. The task for us is how do  
 515 we construct such heterogeneity? An answer is the following. The posterior distribution

$$516 \quad c(p|\bar{y}_1, \bar{y}_2, \gamma, \delta) = \Pr(\bar{y}_2|\bar{y}_1, p)c(p|\gamma, \delta) / \int_{-\infty}^{\infty} \Pr(\bar{y}_2|\bar{y}_1, p)c(p|\gamma, \delta)dp \quad (29)$$

$$517 \quad = p^{\gamma+\bar{y}_2-1}(1-p)^{\delta+\bar{y}_1-\bar{y}_2-1} / \{\Gamma(\gamma+\bar{y}_2)\Gamma(\delta+\bar{y}_1-\bar{y}_2) / \Gamma(\gamma+\delta+\bar{y}_1)\}$$

518

519 would play a key role to construct both the observable and non-observable binomial heterogeneity. With

520  $\Delta_p = p - E(p)$ , it is clear that  $\int_{-\infty}^{\infty} \Delta_\lambda c(p|\gamma, \delta) dp = 0$ .

521 The prior variance is

522 
$$Var(p|\gamma, \delta) = \int_{-\infty}^{\infty} \Delta_\lambda^2 c(p|\gamma, \delta) dp.$$

523 Its posterior counterpart

524 
$$Var(p|\bar{y}_1, \bar{y}_2, \gamma, \delta) = \int_{-\infty}^{\infty} (p - E[p|\bar{y}_1, \bar{y}_2, \gamma, \delta])^2 c(p|\gamma, \delta) dp$$

525 is minimal when the Bayes estimate of non-observable is the posterior mean

526 
$$p_{Bayes} = E(p|\bar{y}_1, \bar{y}_2, \gamma, \delta),$$

527 where

528 
$$\mu_{posterior} = E(p|\bar{y}_1, \bar{y}_2, \gamma, \delta) = \frac{(\gamma + \bar{y}_2)}{(\gamma + \delta + \bar{y}_1)}. \quad (30)$$

529 The posterior variance is

530 
$$Var(p|\bar{y}_1, \bar{y}_2, \gamma, \delta) = \frac{\mu_{posterior}(1 - \mu_{posterior})}{(1 + \gamma + \delta + \bar{y}_1)}. \quad (31)$$

531 Differentiating the log-likelihood function as

532 
$$\ln L(n, \bar{y}_1, \bar{y}_2, p) = \bar{y}_2 \ln p + (\bar{y}_1 - \bar{y}_2) \ln(1 - p) + \sum_{i=1}^n \ln \binom{y_i}{y_{2,i}}$$

533 with respect to the non-observable parameter,  $p$ , setting it equal to zero and solving it, we obtain the

534 MLE and it is  $\hat{p}_{mle} = \frac{\bar{y}_2}{\bar{y}_1}$  It is known that

535 
$$E_{prior} E_{likelihood}(\bar{y}_2 | \bar{y}_1, p) = E(\bar{y}_2) \quad (32)$$

536 and

$$537 \quad \text{Var}(\bar{y}_2) = E_{\text{prior}} \text{Var}_{\text{likelihood}}(\bar{y}_2 | \bar{y}_1, p) + \text{Var}_{\text{prior}} E_{\text{likelihood}}(\bar{y}_2 | \bar{y}_1, p). \quad (33)$$

538

539 Hence, we define the non-observable binomial heterogeneity below in Definition 3.

540

541 *Definition 3.* The non-observable binomial heterogeneity is defined as

542

$$543 \quad H_{y_1, p} = \left[ 1 + \frac{\text{Var}_{\text{prior}} E_{\text{likelihood}}(\bar{y}_2 | \bar{y}_1, p)}{E_{\text{prior}} \text{Var}_{\text{likelihood}}(\bar{y}_2 | \bar{y}_1, p)} \right]^{-1} \in [0, 1]. \quad (34)$$

544

545 Following the Definition 3, we obtain the *non-observable heterogeneity* of the COVID-19's asymptotic

546 cases (remembering that  $(\bar{y}_1, \gamma, \delta)$  are the non-observable parameters) as

$$547 \quad H_{y_1, \gamma, \delta} = \left[ 1 + y_1 \frac{\text{Var}_{\text{prior}}(p)}{E_{\text{prior}}(p\{1-p\})} \right]^{-1} = \left[ 1 + \frac{y_1}{(\gamma + \delta)(1 + \gamma + \delta)} \right]^{-1} \in [0, 1]. \quad (35)$$

548 When the value of  $H_{y_1, \gamma, \delta}$  is closer to zero, the data are interpreted to have non-observable binomial

549 homogeneity. Substituting the MLEs

$$550 \quad \hat{\gamma} = \bar{p} \left\{ \frac{\bar{p}(1-\bar{p})}{s_p^2} - 1 \right\} \quad \text{and} \quad \hat{\delta} = \frac{(1-\bar{p})\hat{\gamma}}{\bar{p}}, \quad (36)$$

551 we obtain its MLE

$$552 \quad \hat{H}_{y_1, \gamma, \delta} = \left[ 1 + \frac{y_1 (s_p^2)^2}{(\bar{p}(1-\bar{p}) - s_p^2) \bar{p}(1-\bar{p})} \right]^{-1} \in [0, 1]. \quad (37)$$

553 Likewise, the *observable-heterogeneity* of the binomial distribution of  $y_2$  is defined below in Definition

554 4.

555 *Definition 4.* The observable heterogeneity of the binomial counts,  $y_{2,i}, i = 1, 2, \dots, y_1$  (in terms of the  
 556 complete sufficient statistic  $\bar{y}_2$ ) is defined as

$$557 \quad H_{y_2} = \left[ 1 + \frac{\text{Var}_{\text{marginal}} E_{\text{posterior}}(p | \bar{y}_1)}{E_{\text{marginal}} \text{Var}_{\text{posterior}}(p | \bar{y}_1)} \right]^{-1} \in [0, 1]. \quad (38)$$

558 Before we apply Definition 4, remember that the marginal pdf of the complete sufficient statistic,  $\bar{y}_2$  is  
 559 the beta-binomial distribution,

$$560 \quad \Pr(\bar{Y}_2) = \binom{\bar{y}_1}{\bar{y}_2} \frac{\Gamma(\gamma + \bar{y}_2) \Gamma(\delta + \bar{y}_1 - \bar{y}_2)}{\Gamma([\gamma + \delta] + \bar{y}_1)}, \quad (39)$$

561 and the posterior distribution is beta. With the notation  $B(a, b) = \frac{\Gamma(a)\Gamma(b)}{\Gamma(a+b)}$ , we note that the probability

562 mass function of the beta-binomial distribution is

$$563 \quad \Pr(y_2) = \binom{y_1}{y_2} B(\gamma + y_2, \delta + y_1 - y_2) / B(\gamma, \delta); y_2 = 0, 1, 2, \dots, y_1; \gamma, \delta > 0. \quad (40)$$

564 That is, the posterior probability density function is

$$565 \quad c(p | \bar{y}_1, \bar{y}_2, \gamma, \delta) = \frac{\Gamma(\gamma + \delta + \bar{y}_1)}{\Gamma(\gamma + \bar{y}_2) \Gamma(\delta + \bar{y}_1 - \bar{y}_2)} p^{\gamma + \bar{y}_2 - 1} (1 - p)^{\delta + \bar{y}_1 - \bar{y}_2 - 1} \quad (41)$$

566 with

$$567 \quad E(p | \bar{y}_1, \bar{y}_2, \gamma, \delta) = \frac{(\gamma + \bar{y}_2)}{([\gamma + \delta] + \bar{y}_1)} \quad (42)$$

568 and

$$569 \quad \text{Var}(p | \bar{y}_1, \bar{y}_2, \gamma, \delta) = \frac{(\gamma + \bar{y}_2)(\delta + \bar{y}_1 - \bar{y}_2)}{([\gamma + \delta] + \bar{y}_1)(1 + [\gamma + \delta] + \bar{y}_1)}. \quad (43)$$

570 Now applying Definition 4, we obtain an expression for the observable binomial heterogeneity

$$H_{y_2|y_1} = \left[ 1 + \frac{\text{Var}_{\text{marginal}} \left\{ \frac{(\gamma + y_2)}{(\gamma + \delta + y_1)} \right\}}{E_{\text{marginal}} \left\{ \frac{(\gamma + y_2)(\delta + y_1 - y_2)}{(\gamma + \delta + y_1)(1 + \gamma + \delta + y_1)} \right\}} \right]^{-1} \approx \left[ 1 + \left( \frac{\delta}{\delta + \gamma} \right) \left( \frac{y_1}{y_1 + \delta} \right) \right]^{-1} \in [0, 1],$$

whose estimate is

$$H_{y_2|y_1} \approx \left[ 1 + \bar{p} \left( \frac{y_1 s_p^2}{y_1 s_p^2 + \{1 - \bar{p}\} |\bar{p}(1 - \bar{p}) - s_p^2|} \right) \right]^{-1},$$

Because

$$\hat{\gamma} \approx \bar{p} \left\{ \frac{\bar{p}(1 - \bar{p})}{s_p^2} - 1 \right\} \quad \text{and} \quad \hat{\delta} \approx \frac{\hat{\gamma}(1 - \bar{p})}{\bar{p}}.$$

When the value of  $\hat{H}_{y_2|y_1}$  is closer to zero, the data are considered to have observable binomial homogeneity. Also, the distance,  $d(y_2, p)$  between the observable  $y_2$  of the number of asymptomatic COVID-19 cases and its proportion,  $p$  could be assessed using the formula

$$d(y_2, p) = E_{y_2} E_p |Y_2 - p| = \sum_{y_2=0}^{y_1} \int_0^{\infty} |Y_2 - p| \Pr(y_2 | p) c(p | y_1, y_2, \gamma, \delta) dp.$$

Realizing that the absolute difference,  $|Y_2 - p| = Y_2 + p - 2 \min\{Y_2, p\}$ , we obtain after simplifications that

$$d(y_2, p) = |y_1 - 1| \left( \frac{\gamma}{\gamma + \delta} \right).$$

Likewise, to obtain the *non-observable heterogeneity* of the COVID-19's symptomatic cases, all we have to do is change  $p$  to  $(1 - p)$ , change  $y_2$  to  $y_3$ , along with changing  $\gamma$  to  $\delta$  and go through the process above. Hence, the non-observable heterogeneity in the symptomatic cases is the same. That is,

$$H_{y_1, \delta, \gamma} = \left[ 1 + y_1 \frac{\text{Var}_{\text{prior}}(1 - p)}{E_{\text{prior}}(p\{1 - p\})} \right]^{-1} = \left[ 1 + \frac{y_1}{(\gamma + \delta)(1 + \gamma + \delta)} \right]^{-1} \in [0, 1].$$

The observable binomial heterogeneity for the symptomatic cases is

588 
$$H_{y_3|y_1} \approx [1 + (\frac{\gamma}{\delta + \gamma})(\frac{y_1}{y_1 + \gamma})]^{-1} \in [0, 1], \quad (50)$$

589 whose MLE is

590 
$$\hat{H}_{y_3|y_1} \approx [1 + \bar{p}(\frac{y_1 s_p^2}{y_1 s_p^2 + \bar{p}|\bar{p}(1 - \bar{p}) - s_p^2})]^{-1}, \quad (51)$$

591 which is interestingly not the same as  $\hat{H}_{y_2|y_1}$ . Also, the distance,  $d(y_3, 1 - p)$  between the observable  $y_3$  of  
 592 the number of asymptomatic COVID-19's symptomatic cases and the proportion,  $1 - p$  could be assessed  
 593 using the formula

594 
$$d(y_3, 1 - p) = E_{Y_2} E_p |Y_2 - (1 - p)| = \sum_{y_3=0}^{y_1} \int_0^{\infty} |Y_3 - (1 - p)| \Pr(y_3 | 1 - p) c(1 - p | y_1, y_2, \gamma, \delta) d(1 - p) \quad (52)$$

596 and it is after simplifications that

597 
$$d(y_3, p) = |y_1 - 1|(\frac{\delta}{\gamma + \delta}). \quad (53)$$

598 Now we explore statistical properties of the asymptomatic cases,  $y_2$ . The survival function of the  
 599 random number,  $Y_2$  with asymptotic symptoms is

600 
$$S_{Y_2}(r, p | y_1) = \Pr(Y_2 \geq r | y_1) = \sum_{i=r}^{\infty} \frac{y_1!}{i!(y_1 - i)!} p^i (1 - p)^{y_1 - i} = P[F_{(2r, 2[y_1 - r + 1])}^{df} \leq \frac{y_1 p (y_1 - r + 1)}{(1 - p)r}]; 0 < p < 1. \quad (54)$$

602 The hazard rate,  $h(y)$  of the binomial distribution for the asymptomatic cases is

603 
$$h(y_2) = \frac{\Pr(y_2 | p)}{S(y_2 + 1 | p)} = \frac{y_1! \{ \frac{p}{1 - p} \}^{y_2} \{1 - p\}^{y_1}}{y_2! (y_1 - y_2)! P[F_{(2r, 2[y_1 - r + 1])}^{df} \leq \frac{y_1 p (y_1 - r + 1)}{\{1 - p\}r}]}; 0 < p < 1. \quad (55)$$

604 The binomial distribution has a finite *memory*



$$605 \quad \Pr(Y_2 \geq s | y_2 \geq r) = \frac{\Pr(Y_2 \geq r+s)}{\Pr(Y_2 \geq r)} = \frac{P[F_{(2r, 2[y_1 - (r+s)+1])df} \leq \frac{y_1 p (y_1 - (r+s) + 1)}{\{1-p\}(r+s)}]}{P[F_{(2r, 2[y_1 - r + 1])df} \leq \frac{y_1 p (y_1 - r + 1)}{\{1-p\}r}]} \quad (56)$$

606 confirming that the usual binomial distribution does possess a finite memory. The conditional odds, for a  
 607 fixed  $y_1$ , for safe asymptomatic symptom are

$$608 \quad Odds_{y_2|y_1} = \frac{\Pr(Y_2 = 0)}{\Pr(Y_2 \geq 1)} = (1-p)^{y_1} \{1 - (1-p)^{y_1}\}^{-1} \approx (1-p)^{y_1} \{1 + (1-p)^{y_1}\}. \quad (57)$$

609 The unconditional odds for safe asymptomatic symptom are

$$610 \quad odds_{y_2} \approx \sum_{y_1=0}^{\infty} Odds_{y_2|y_1} \Pr[Y_1 = y_1 | \lambda] \approx \sum_{y_1=0}^{\infty} (1-p)^{y_1} \{1 + (1-p)^{y_1}\} e^{-\lambda} \lambda^{y_1} / y_1! \approx e^{-p\lambda} \{1 + e^{-p(1-p)\lambda}\}$$

611 (58)

612 The reader is referred to Figure 4 for the configuration of the odds in asymptomatic COVID-19 occurrences  
 613 in general.

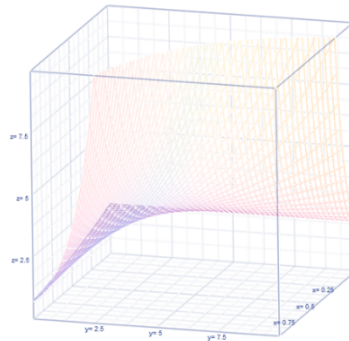

614  
 615 **Figure 4. Odds for Asymptotic**

616  
 617 Recall that  $S_{y_2}(1, p | y_1) = \Pr(Y_2 \geq 1 | y_1)$  is the likelihood for the existence of asymptomatic presentation of  
 618 COVID-19 in the ship. The hazard in that situation (that is, with  $r = 1$ ) is

619

$$620 \quad h_{Y_2}(1|y_1, p) = 1 - \frac{P[F_{(4,2[y_1-1])df} \leq \frac{y_1 \hat{p}_{mle}(y_1-1)}{2(1-\hat{p}_{mle})}]}{P[F_{(4,2y_1)df} \leq \frac{y_1^2 \hat{p}_{mle}}{(1-\hat{p}_{mle})}]}, \quad (59)$$

621 where  $\hat{p}_{mle} = \bar{y}_2$ . A popular statistical concept in the business world (Khokhlov, 2016 for details), *Tail*  
 622 *Value at Risk* (Tar) is

$$623 \quad TVaR_{Y_2} = E[Y_2 | Y_2 \geq 1, p, y_1] \approx 1 + \frac{y_1(1-p)}{p^2 P[F_{(2r,2y_1)df} \leq \frac{y_1^2 p}{(1-p)}]}. \quad (60)$$

624 Similarly, all the Bayesian results for the binomial random variable,  $y_3$  are easily derivable by  
 625 interchanging  $\gamma$  and  $\delta$  in all above expressions. The survival function of the random number,  $Y_3$  with  
 626 symptomatic symptoms is

$$627 \quad S_{Y_3}(r, p|y_1) = \Pr(Y_3 \geq r|y_1) = \sum_{i=r}^{\infty} \frac{y_1!}{i!(y_1-i)!} (1-p)^i p^{y_1-i} = P[F_{(2r,2[y_1-r+1])df} \leq \frac{y_1(1-p)(y_1-r+1)}{pr}]; 0 < p < 1. \quad (61)$$

629 The hazard rate,  $h(y)$  for the symptomatic sign is

$$630 \quad h(y_3) = \frac{\Pr(y_3|p)}{S(y_3+1|p)} = \frac{y_1! \left\{ \frac{1-p}{p} \right\}^{y_3} p^{y_1}}{y_3!(y_1-y_2)! P[F_{(2r,2[y_1-r+1])df} \leq \frac{y_1(1-p)(y_1-r+1)}{pr}]}; 0 < p < 1. \quad (62)$$

632 The binomial distribution of those with symptomatic signs has a finite *memory*

$$633 \quad \Pr(Y_3 \geq s | Y_3 \geq r) = \frac{\Pr(Y_3 \geq r+s)}{\Pr(Y_3 \geq r)} = \frac{P[F_{(2r,2[y_1-(r+s)+1])df} \leq \frac{y_1(1-p)(y_1-(r+s)+1)}{p(r+s)}]}{P[F_{(2r,2[y_1-r+1])df} \leq \frac{y_1(1-p)(y_1-r+1)}{pr}]},$$

634 (63)

635 confirming that the usual binomial probability trend of those with symptomatic signs does possess a  
 636 finite memory. The conditional odds, for a fixed  $y_1$ , for *safe* symptomatic symptom are

637 
$$Odds_{Y_3|y_1} = \frac{\Pr(Y_3 = 0)}{\Pr(Y_3 \geq 1)} = p^{y_1} \{1 - p^{y_1}\}^{-1} \approx p^{y_1} \{1 + p^{y_1}\}. \quad (64)$$

638 The unconditional odds for safe symptomatic symptom are

639 
$$odds_{Y_3} \approx \sum_{y_1=0}^{\infty} Odds_{y_1} \Pr[Y_1 = y_1 | \lambda] \approx \sum_{y_1=0}^{\infty} p^{y_1} \{1 + p^{y_1}\} e^{-\lambda} \lambda^{y_1} / y_1! \approx e^{-(1-p)\lambda} \{1 + e^{-p(1-p)\lambda}\}. \quad (65)$$

640 A comparison of  $odds_{Y_2}$  and  $odds_{Y_3}$  suggests the odds ratio,

641 
$$OR_{Y_3/Y_2} = \frac{odds_{Y_3}}{odds_{Y_2}} = e^{-(1-2p)\lambda}. \quad (66)$$

642 See Figure 5 for the configuration of the isomorphic factor,  $e^{-(1-2p)\lambda}$ .

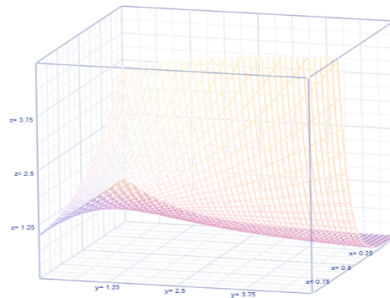

643

644 **Figure 5. The configuration isomorphic factor  $e^{-(1-2p)\lambda}$**

645

646 Recall that  $S_{Y_3}(1, p | y_1) = \Pr(Y_3 \geq 1 | y_1)$  is the chance for the existence of symptomatic symptom of

647 COVID-19. The hazard in that situation (that is, with  $r = 1$ ) is

$$648 \quad h_{Y_3}(1|y_1, p) = 1 - \frac{P[F_{(4,2[y_1-1])df} \leq \frac{y_1(1-\hat{p}_{mle})(y_1-1)}{2\hat{p}_{mle}}]}{P[F_{(4,2y_1)df} \leq \frac{y_1^2(1-\hat{p}_{mle})}{\hat{p}_{mle}}]}, \quad (67)$$

649 where  $\hat{p}_{mle} = \bar{y}_2$ . The *Tail Value at Risk* (TVaR) is

$$650 \quad TVaR_{Y_3} = E[Y_3 | Y_3 \geq 1, p, y_1] \approx 1 + \frac{y_1 p}{(1-p)^2 P[F_{(2r,2y_1)df} \leq \frac{y_1^2(1-p)}{p}]} . \quad (68)$$
